# Supplementary material for: Large-scale production of a thermostable Rhodothermus marinus cellulase by heterologous secretion from Streptomyces lividans
Source: PubMed Central journal article supplement (PMC5741968; doi:10.1186/s12934-017-0847-x), 2017-12-23
Supplement: 12934_2017_847_MOESM1_ESM.pdf [file 12934_2017_847_MOESM1_ESM.pdf]

**Additional file 1:****Large-scale production of a thermostable *Rhodothermus marinus* cellulase by heterologous secretion from *Streptomyces lividans***

Hamed, Mohamed Belal<sup>1,4</sup>; Karamanou, Spyridoula<sup>1</sup>; Ólafsdóttir, Solveig<sup>2</sup>; Basílio, Joan Sofia Martins<sup>3</sup>; Simoens, Kenneth<sup>3</sup>; Tsolis, C. Kostantinos<sup>1</sup>; Van Mellaert, Lieve<sup>1</sup>; Guðmundsdóttir, Eik Elísabet<sup>2</sup>; Hreggvidsson, Gudmundur Oli<sup>2</sup>; Anné, Jozef<sup>1</sup>; Bernaerts, Kristel<sup>3</sup>; Fridjonsson, H. Olafur<sup>2</sup> and Economou, Anastassios<sup>1,5</sup>

<sup>1</sup>KU Leuven, Rega Institute, Dpt of Microbiology and Immunology, Herestraat 49, B-3000 Leuven, Belgium

<sup>2</sup>Matis, Vínlandsleid 12, 113 Reykjavík, Iceland

<sup>3</sup>KU Leuven, Bio- & chemical systems Technology, Reactor Engineering and Safety Section, Department of Chemical Engineering, Celestijnenlaan 200F, 3001 Leuven, Belgium.

<sup>4</sup>Department of Molecular Biology, National Research Centre, Dokki, Giza, Egypt

<sup>5</sup> For correspondence,

E-mail: tassos.economou@kuleuven.be

## **Table of contents**

### **Additional Figures**

Figure S1 Amino acid sequence of cellulase A (CelA)

Figure S2 pIJ486\_ *Vsi-ceIA* plasmid.

### **Additional Tables**

Table S1 Annotated secreted cellulase-related hydrolases in the *S. lividans* TK24 proteome.

### **References**

-3 -1

```

1  MRRTLKAVGA  AAAAAATCVLA  ATAGTAQAEA  KEPEPEPEPT  VELCGRWDAR  DVAGGRYRVI
61  NNVWGAETAQ  CIEVGLETGN  FTITRADHDN  GNNVAAYPAI  YFGCHWGACT  SNSGLPRRVQ
121  ELSDVRTSWT  LTPITTGRWN  AAYDIWFSPV  TNSNGYSSG  AELMIWLNWN  GGVMPPGSRV
181  ATVELAGATW  EVWYADWDWN  YIAYRRTTPT  TSVSELDLKA  FIDDAVARGY  IRPEWYLHAV
241  ETGFELWEGG  AGLRSADFSV  TVQ

```

**Fig. S1 Amino acid sequence of cellulase A from *Rodothermus marinus***

Amino acid sequence of cellulase A (CelA) from *Rodothermus marinus* fused to signal peptide of Vsi (SP<sup>Vsi</sup>), the subtilisin inhibitor of *Streptomyces venezuelae* (Uniprot: SSI\_STRVL); highlighted in red). The cleavage site (-3 and -1) of the Vsi signal peptide predicted by SignalP4.0 is included at Alanine 26 and Alanine 28 of the sequence. Two additional amino acids of the mature Vsi domain (Glu-Ala, underlined) were maintained in the SP<sup>Vsi</sup>-CelA fusion protein. The CelA sequence starts from lysine at position 30 (bold K)(residue 29 in the original CelA from *Rhodothermus marinus* sequence (Uniprot: O33897\_RHOMR).

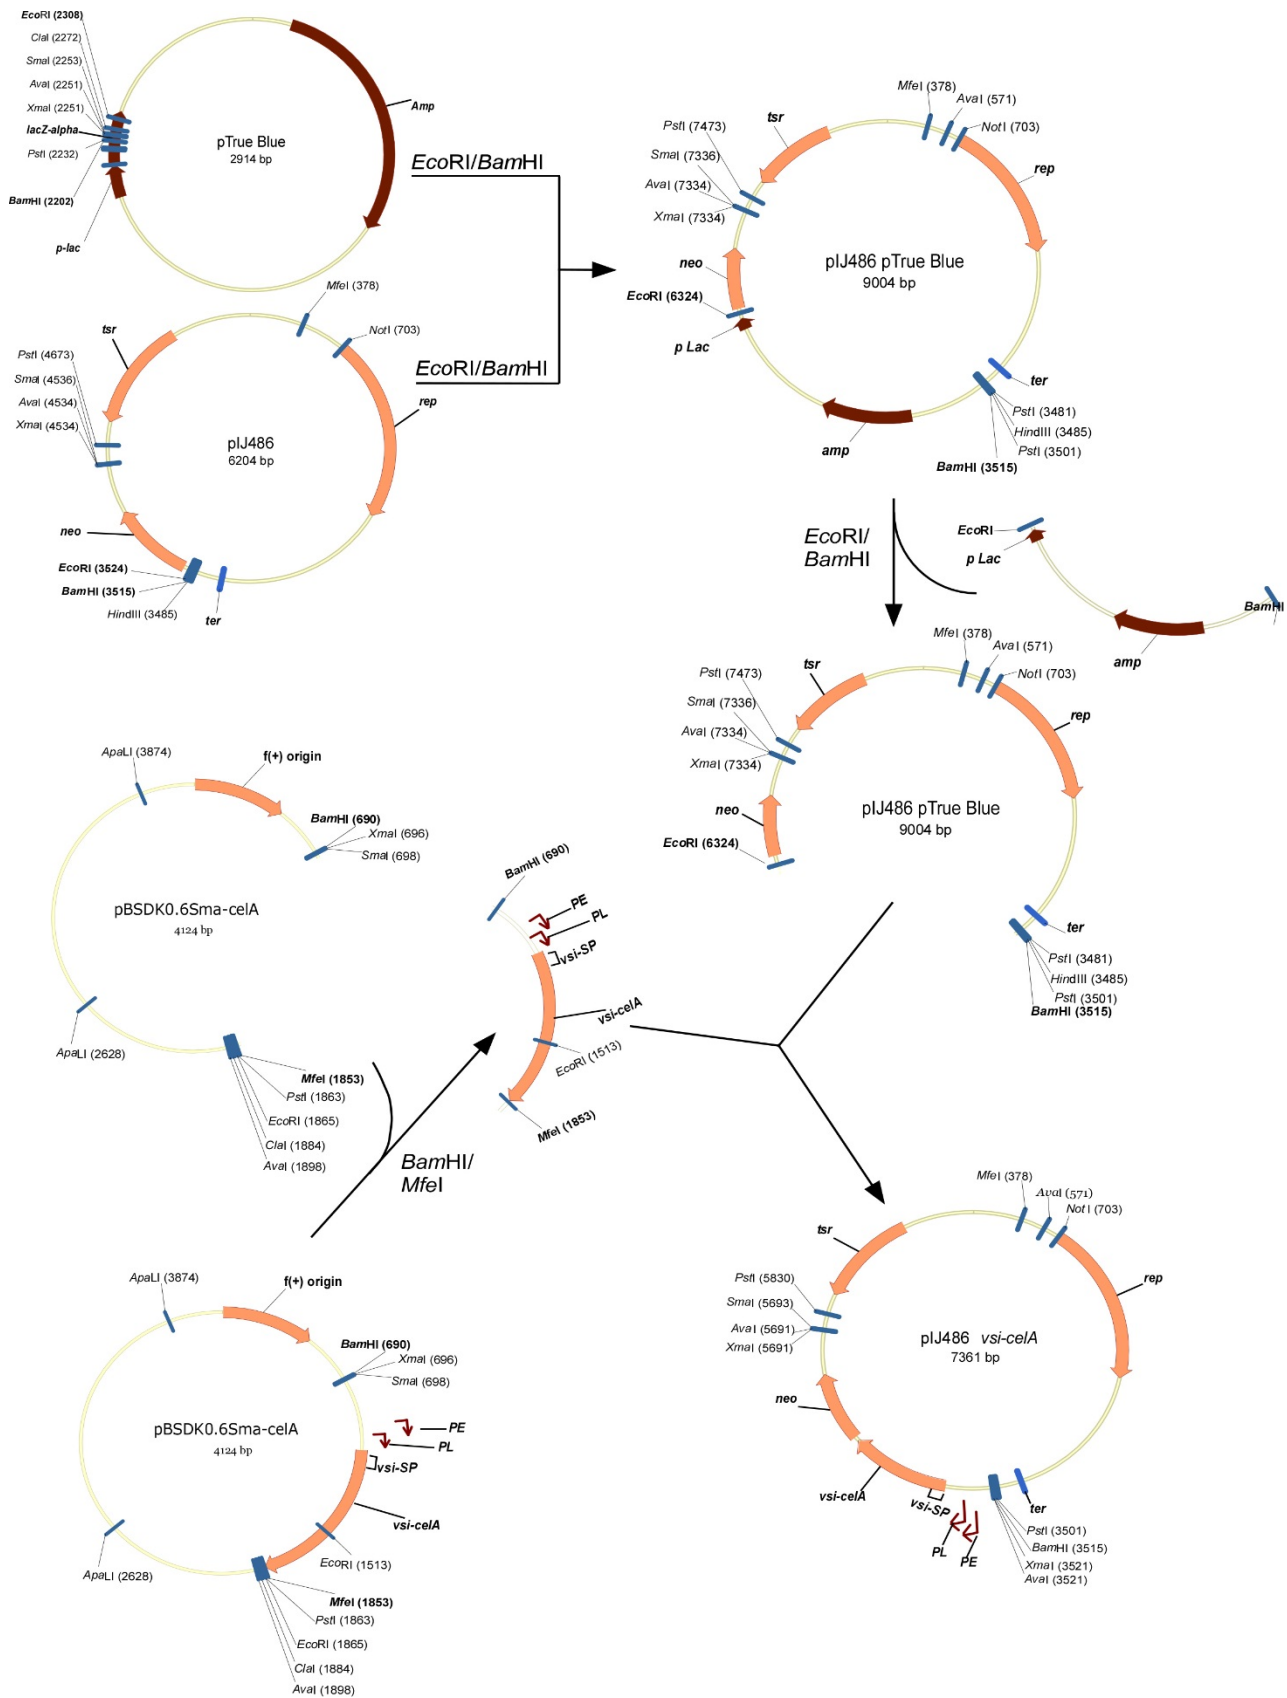

**Fig. S2. Scheme of cloning of *vsi-celA* in *pIJ486***

Vector pIJ486 [1] was modified and converted into the *Streptomyces-E.coli* shuttle-vector pIJ486\_pTrueBlue by digesting with *EcoRI* and *BamHI* and ligating the linear plasmid with *EcoRI* and *BamHI*-digested pTrueBlue. This was to facilitate recombinant DNA handling steps in *E. coli*. The *E. coli* replication unit was removed from DNase-free pIJ486\_pTrueBlue DNA produced in *E. coli* before transformation to *Streptomyces* with the same restriction enzymes used for cloning. The *vsj* expression/secretion cassette was derived from pBSDK0.6Sma [2] and was isolated as a *BamHI/MfeI* restriction fragment and ligated into *BamHI* and *EcoRI*-digested pIJ486\_pTrueBlue to generate plasmid pIJ486vsj-ceIA.

**Table S1 Annotated secreted cellulases-related hydrolases in *S. lividans* TK24.**

Proteome annotation of *S. lividans* TK24, revealed 14 secreted cellulases (SToPSdb, Tsolis et al., in preparation; [www.stepdb.eu/slividans/slividanst24list.php](http://www.stepdb.eu/slividans/slividanst24list.php)). Five of them have been experimentally detected using mass spectrometry, in various proteomics studies performed in our lab. N/A, not available

| Gene ID    | Gene name | Uniprot Accession | Protein name ( <a href="#">SToPSdb</a> )                              | Experimental detection by mass spectrometry/reference |
|------------|-----------|-------------------|-----------------------------------------------------------------------|-------------------------------------------------------|
| SLIV_23465 |           | D6EWL9            | Secreted lipoprotein (TAT) - Glucanase                                | YES/[3]; (Tsolis et al., in preparation)              |
| SLIV_01130 | celA      | D6ESW5            | Secreted protein (Sec) - Endoglucanase CelA                           | YES/(Tsolis et al., in preparation)                   |
| SLIV_06970 | manA      | A0A076M3U4        | Secreted protein (Sec) - Mannan endo-1,4-beta-mannosidase             | YES/(Tsolis et al., in preparation))                  |
| SLIV_05185 |           | D6EGJ2            | Secreted protein (TAT) – Glucosidase                                  | YES/(Tsolis et al., in preparation)                   |
| SLIV_01430 |           | D6EU74            | Secreted protein (Sec) - Glucan endo-1,3-beta-glucosidase             | YES/(Tsolis et al., in preparation)                   |
| SLIV_05695 | cbhB      | D6EGU5            | Secreted protein (TAT) - Exoglucanase B                               | N/A                                                   |
| SLIV_34105 | cel1      | D6EYB4            | Secreted protein (TAT) - Glycoside hydrolase family 9 - Endoglucanase | N/A                                                   |
| SLIV_31860 | celB      | D6ESG9            | Secreted protein (Sec) - Cellulase B                                  | N/A                                                   |
| SLIV_01515 | glcl      | D6EU91            | Secreted protein (TAT) - Glucan endo-1,3-beta-glucosidase             | N/A                                                   |
| SLIV_05700 | xeg74     | A0A076LTM1        | Secreted protein (Sec) - Xyloglucanase                                | N/A                                                   |
| SLIV_35170 |           | D6EDG7            | Secreted protein (Sec) - Endoglucanase                                | N/A                                                   |
| SLIV_05690 |           | A0A076LZR2        | Secreted protein (Sec) - Glucanase                                    | N/A                                                   |
| SLIV_30510 |           | A0A076MHD6        | Secreted protein (Sec) - Glucanase                                    | N/A                                                   |
| SLIV_01395 |           | A0A076LX29        | Secreted Lipoprotein (Sec) - Glycoside hydrolase family 9             | N/A                                                   |

**References:**

1. Ward JM, Janssen GR, Kieser T, Bibb MJ, Buttner MJ: **Construction and characterisation of a series of multi-copy promoter-probe plasmid vectors for *Streptomyces* using the aminoglycoside phosphotransferase gene from Tn5 as indicator.** *Mol Gen Genet* 1986, **203**:468-478.
2. Van Mellaert L, Lammertyn E, Schacht S, Proost P, Van Damme J, Wroblowski B, Anné J, Scarcez T, Sablon E, Raeymaeckers J, Van Broekhoven A: **Molecular characterization of a novel subtilisin inhibitor protein produced by *Streptomyces venezuelae* CBS762.70.** *DNA Seq* 1998, **9**:19-30.
3. Koepff J, Keller M, Tsolis CK, Busche T, Rückert C, Hamed MB, Anne J, Kalinowski J, Wiechert W, Economou A, Oldiges M: **Fast and reliable strain characterization of *Streptomyces lividans* through micro-scale cultivation.** *Biotechnol Bioeng* 2016:(In press).
